# Supplementary material
Source: PubMed Central journal article supplement (PMC5377803)
Supplement: 10.1074_M116.773499_jbc.M116.773499-1.pdf [file 10.1074_M116.773499_jbc.M116.773499-1.pdf]

Caspase-6 Undergoes a Distinct Helix–Strand Interconversion Upon Substrate Binding

**Kevin B. Dagbay<sup>1</sup>, Nicolas Bolik-Coulon<sup>1</sup>, Sergey N. Savinov<sup>2</sup>, and Jeanne A. Hardy<sup>1\*</sup>**

<sup>1</sup>Department of Chemistry, University of Massachusetts Amherst

<sup>2</sup>Department of Biochemistry & Molecular Biology, University of Massachusetts Amherst

Running title: Caspase-6 helix–strand interconversion

\*To whom correspondence should be addressed : Jeanne A. Hardy, PhD, Department of Chemistry, University of Massachusetts Amherst, 745A Lederle Graduate Research Tower, 710 North Pleasant St., Amherst, MA 01003; E-mail: [hardy@chem.umass.edu](mailto:hardy@chem.umass.edu), Phone: (413) 545-3486, Fax: (413) 545-4490

**Keywords:** cysteine protease, apoptosis, neurodegeneration, hydrogen/deuterium exchange mass spectrometry, molecular dynamics

---

## SUPPLEMENTAL FIGURE LEGENDS

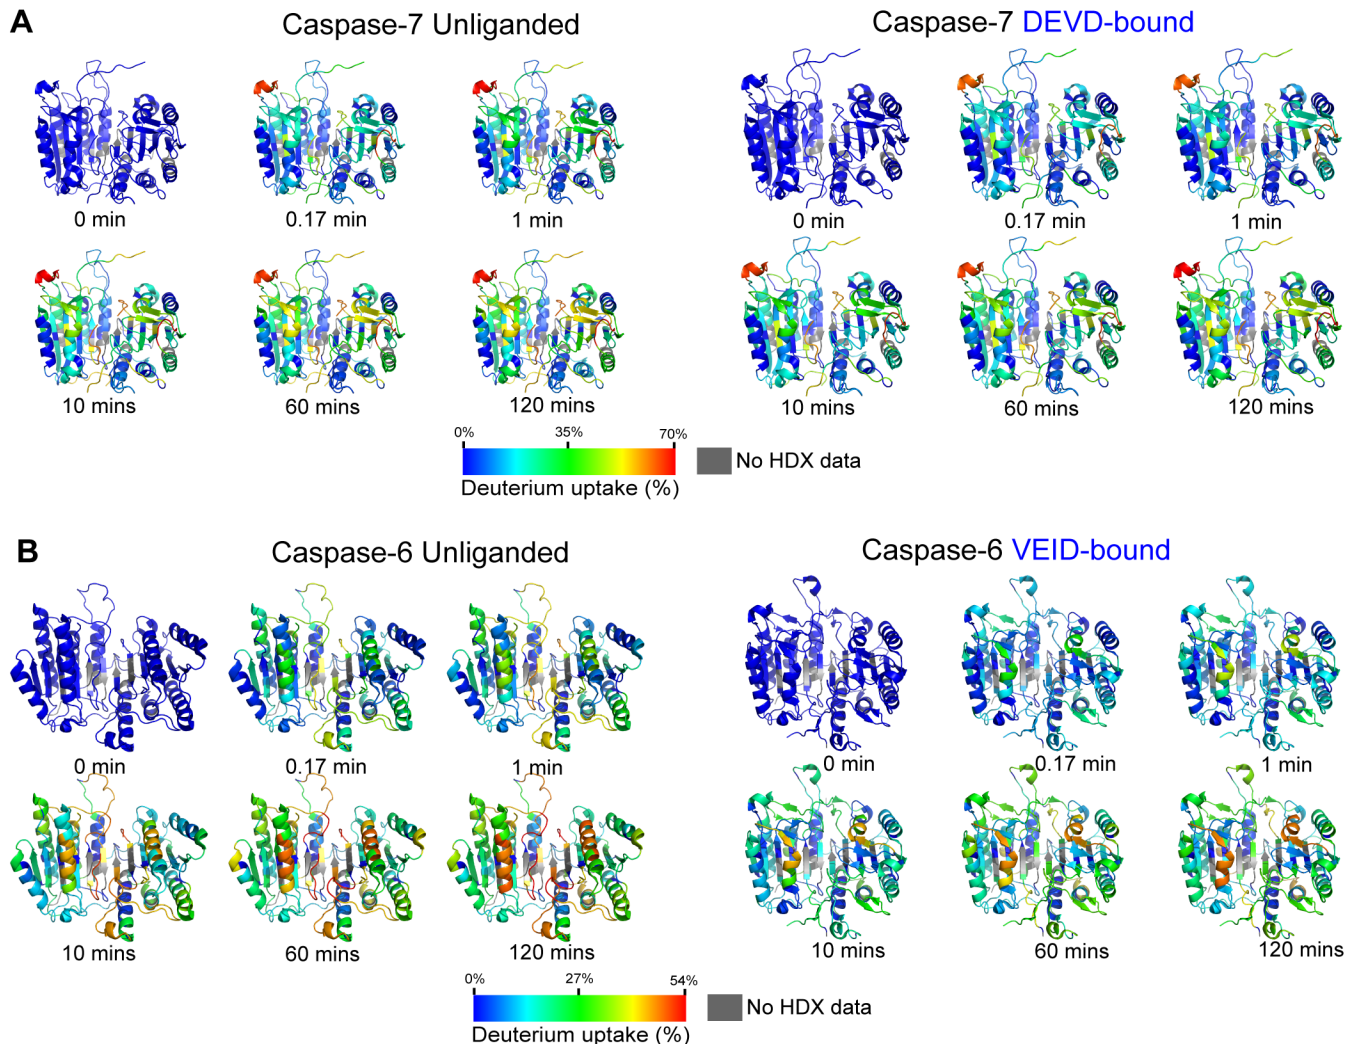

**Supplemental Figure S1.** The percent relative deuterium incorporation of caspase-7 (A) and caspase-6 (B) before and after binding to peptide-based substrate mimic as a function of H/D exchange incubation period are shown mapped onto its corresponding crystal structures (PBD code IK86 for caspase-7; PBD code 2WDP for caspase-6). The percent relative deuterium incorporation is calculated by dividing the observed deuterium uptake by the theoretical maximum deuterium uptake for each peptide. Regions of the protein without H/D exchange data are shown in *gray*.

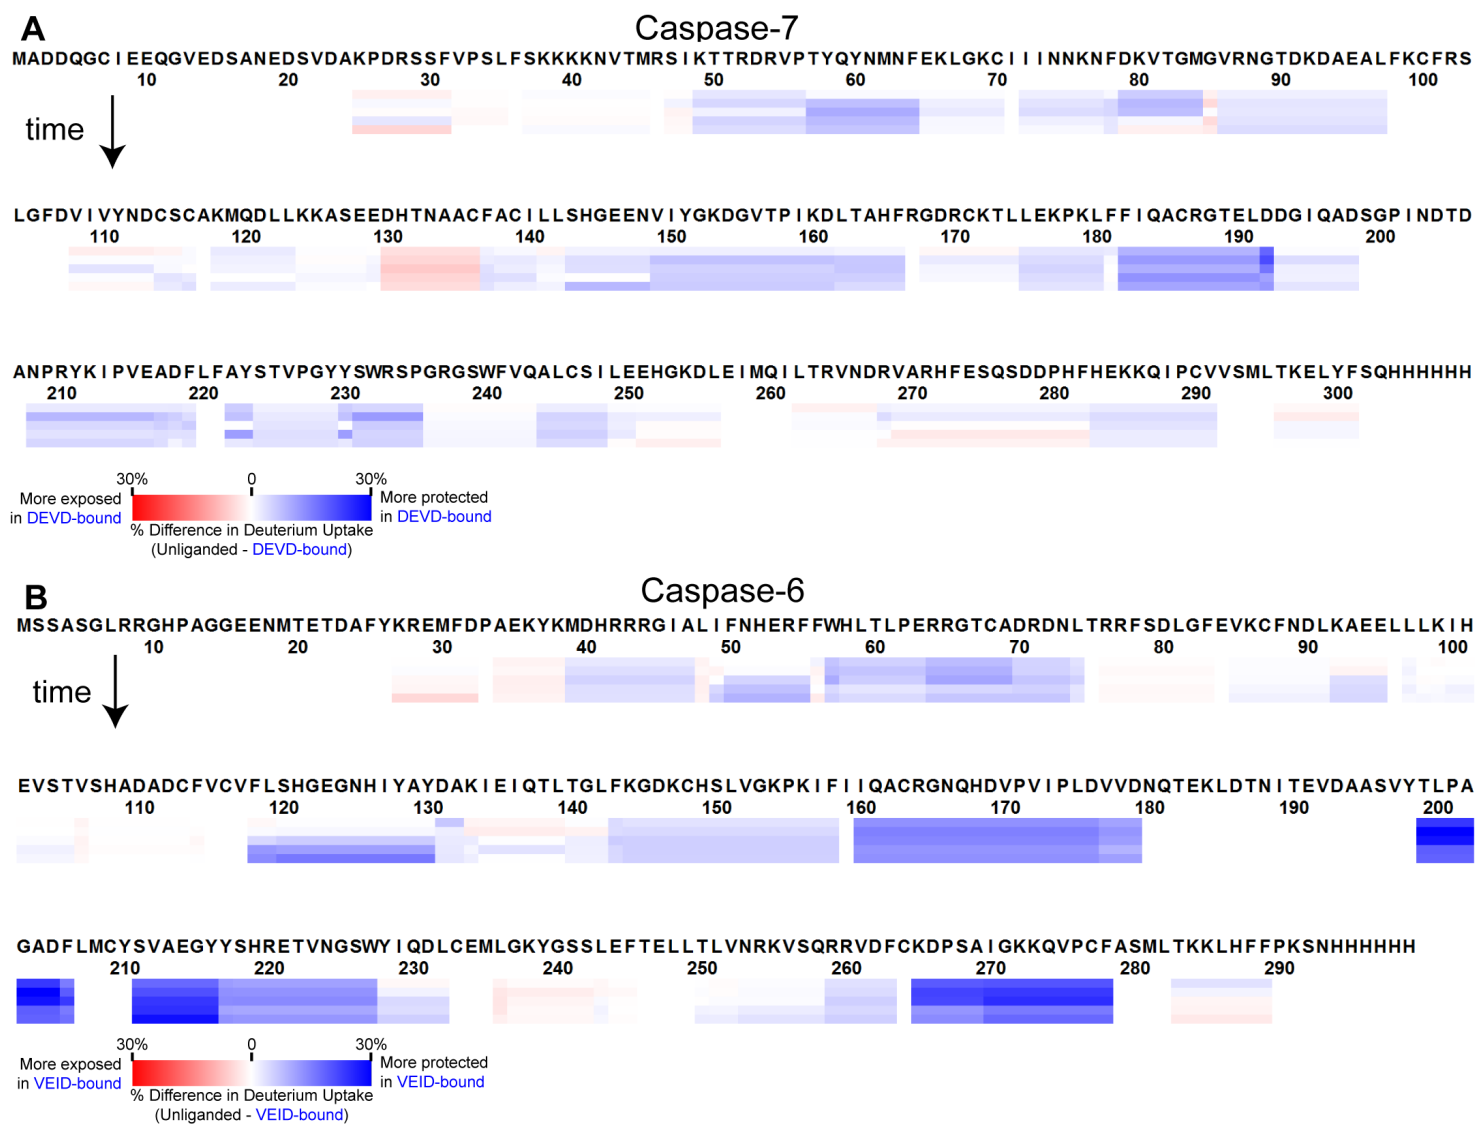

**Supplemental Figure S2.** Heat maps of the percent difference in the deuterium uptake level between the unliganded and the peptide-based substrate mimic-bound states of caspase-7 (A) and caspase-6 (B) are shown mapped onto its corresponding linear sequence. The H/D exchange incubation period (*minutes*: 0.17, 1, 10, 60, and 120) are shown from *top* to *bottom*. The percent relative deuterium incorporation is calculated by dividing the observed deuterium uptake by the theoretical maximum deuterium uptake for each peptide. *Red* regions undergo more H/D exchange (less protected, more flexible) in the unliganded state compared to the peptide-based substrate-bound state. *Blue* regions undergo less H/D exchange (more protected, less flexible) in the unliganded state compared to the peptide-based substrate-bound state. Peptic peptides with no H/D exchange data are colored *white*.

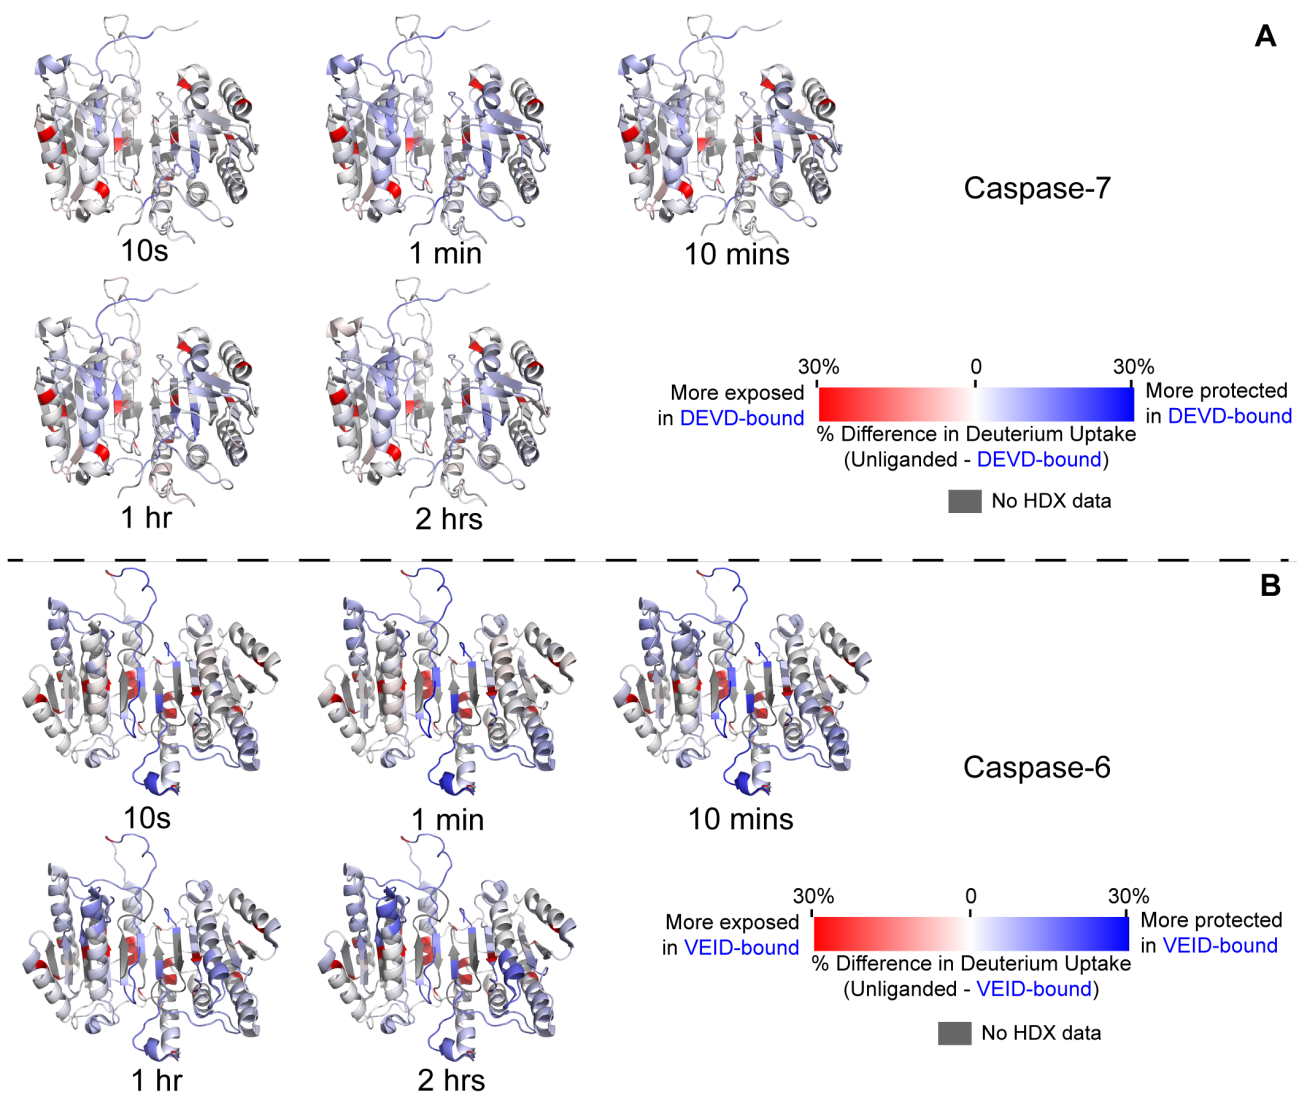

**Supplemental Figure S3.** Heat maps of the percent difference in the deuterium uptake level between the unliganded and the peptide-based substrate mimic-bound states of caspase-7 (A) and caspase-6 (B) are shown mapped onto its corresponding crystal structures (PBD code 1K86 for caspase-7; PBD code 2WDP for caspase-7). Regions of the protein without H/D exchange data are shown in *gray*.

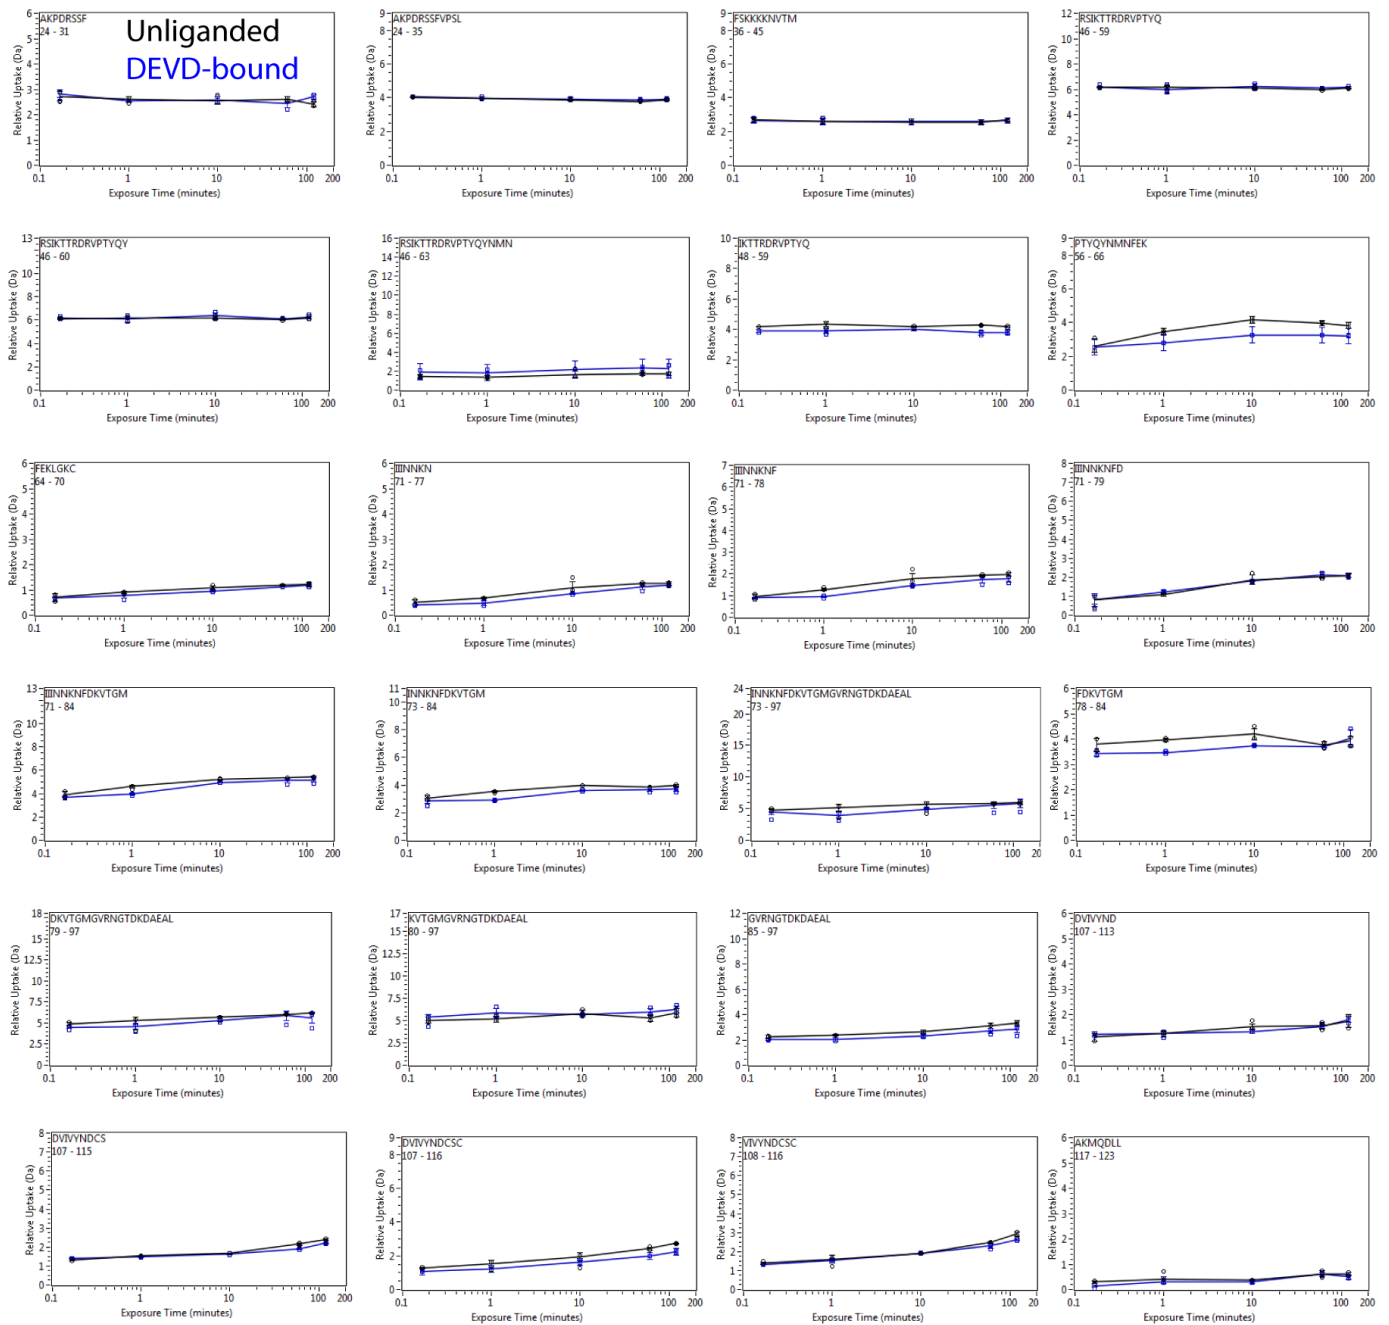

**Supplemental Figure S4.** Relative deuterium uptake plots comparing the unliganded (*black line*) and the DEVD-bound (*blue line*) states of caspase-7 as a function of H/D exchange incubation period. The amino acid sequence and number are shown for each peptic peptide of caspase-7. The standard deviations (SD) of two independent H/DX-MS experiments performed in two separate days are indicated.

## Supplemental Figure S4 (continued)

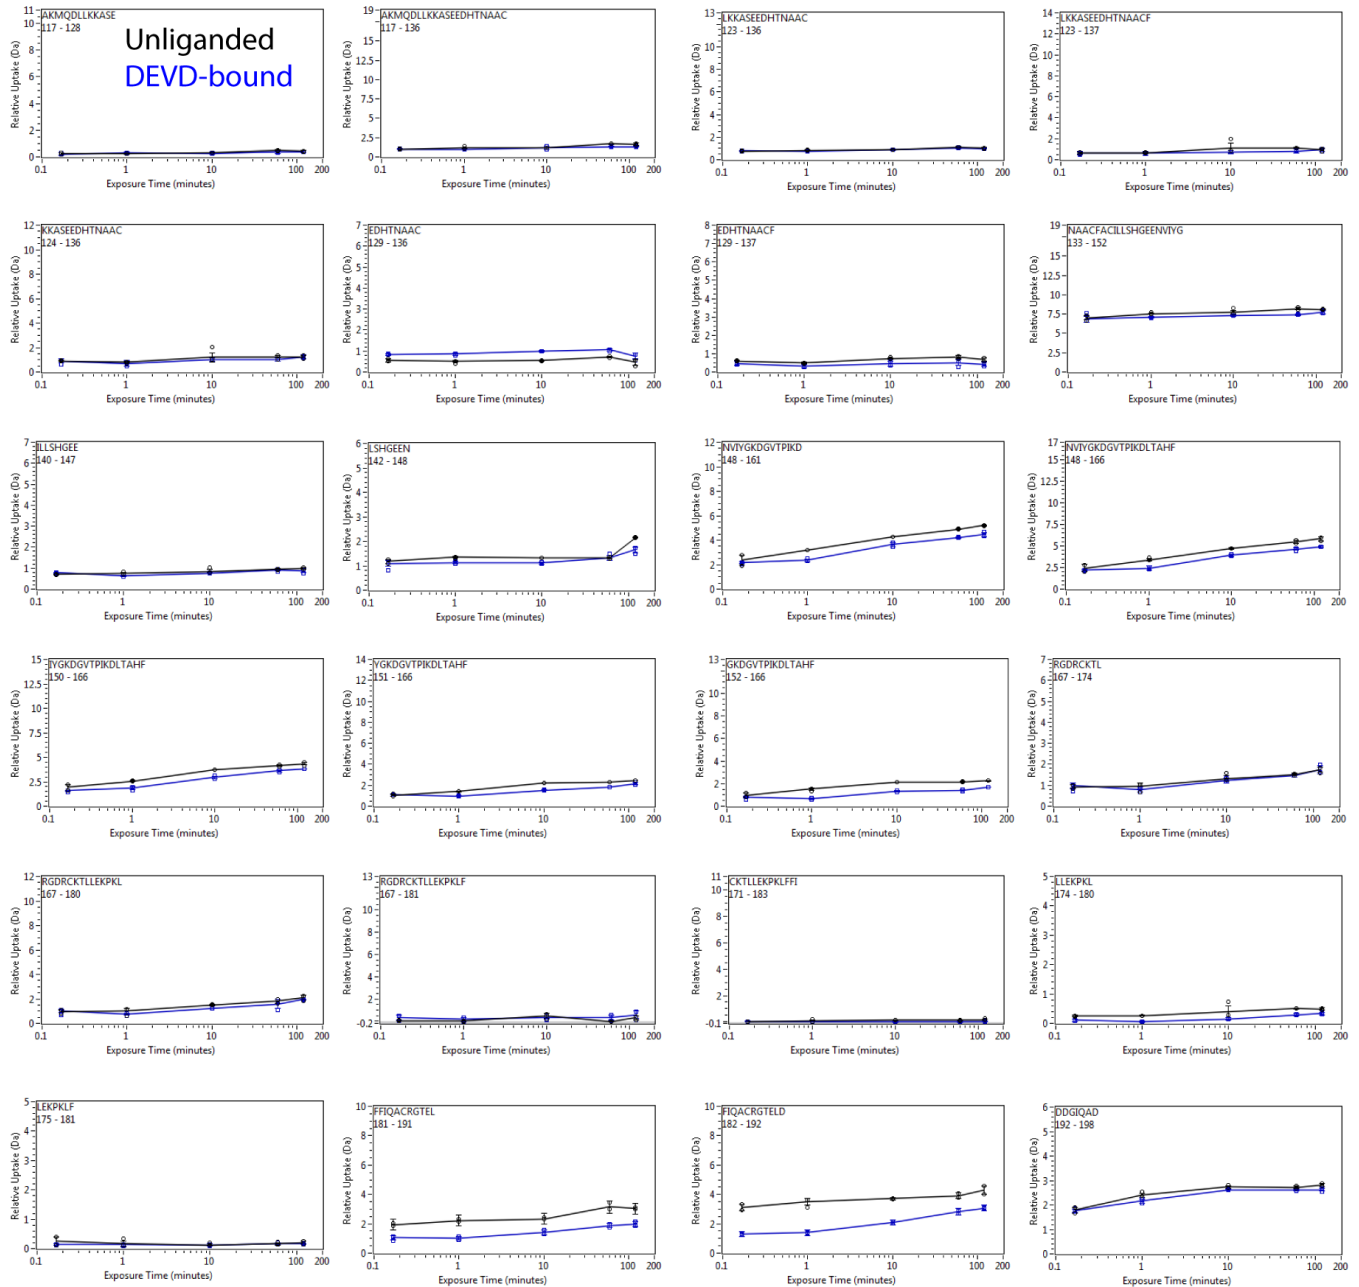

## Supplemental Figure S4 (continued)

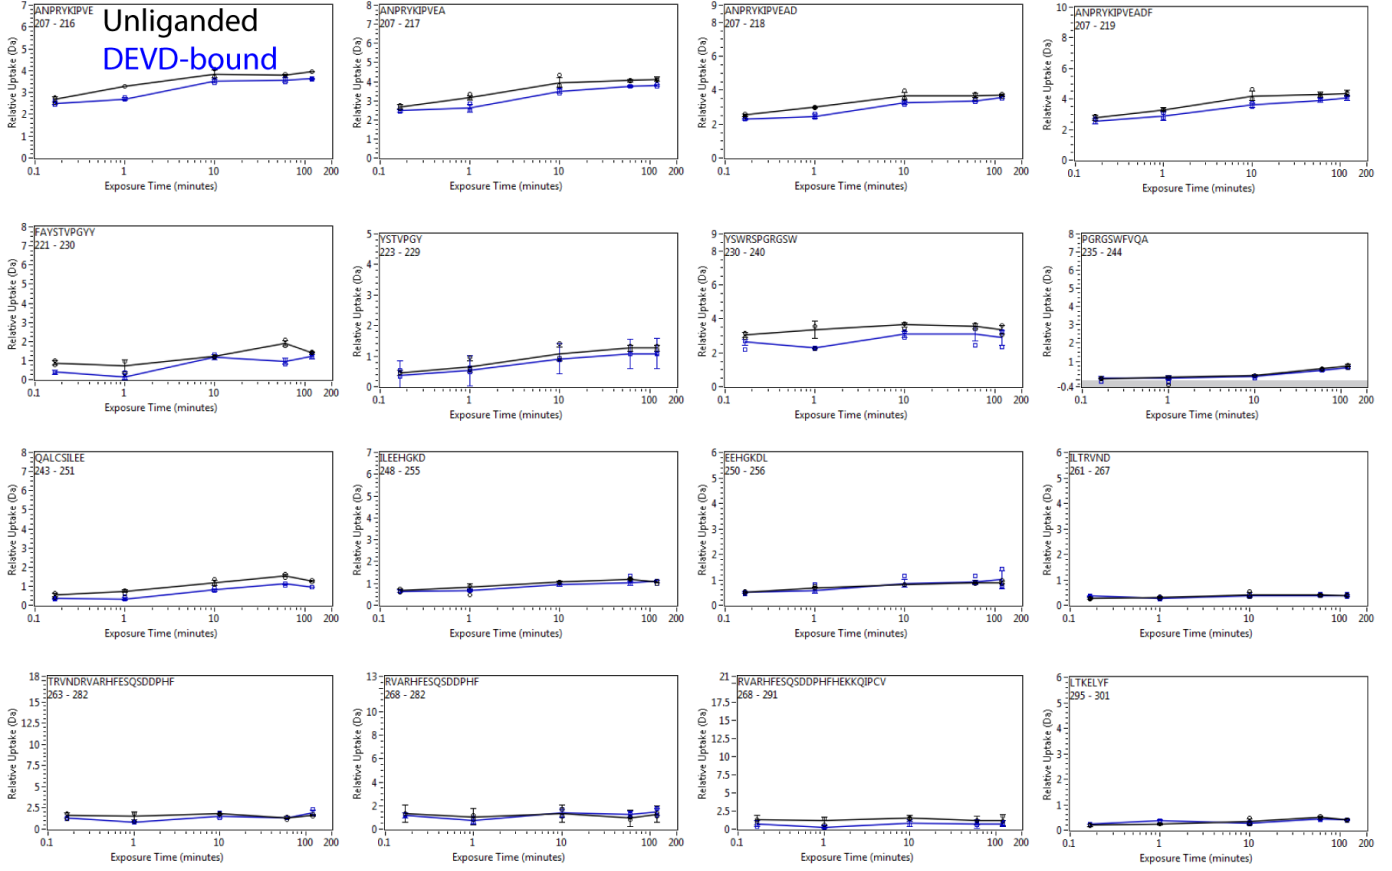

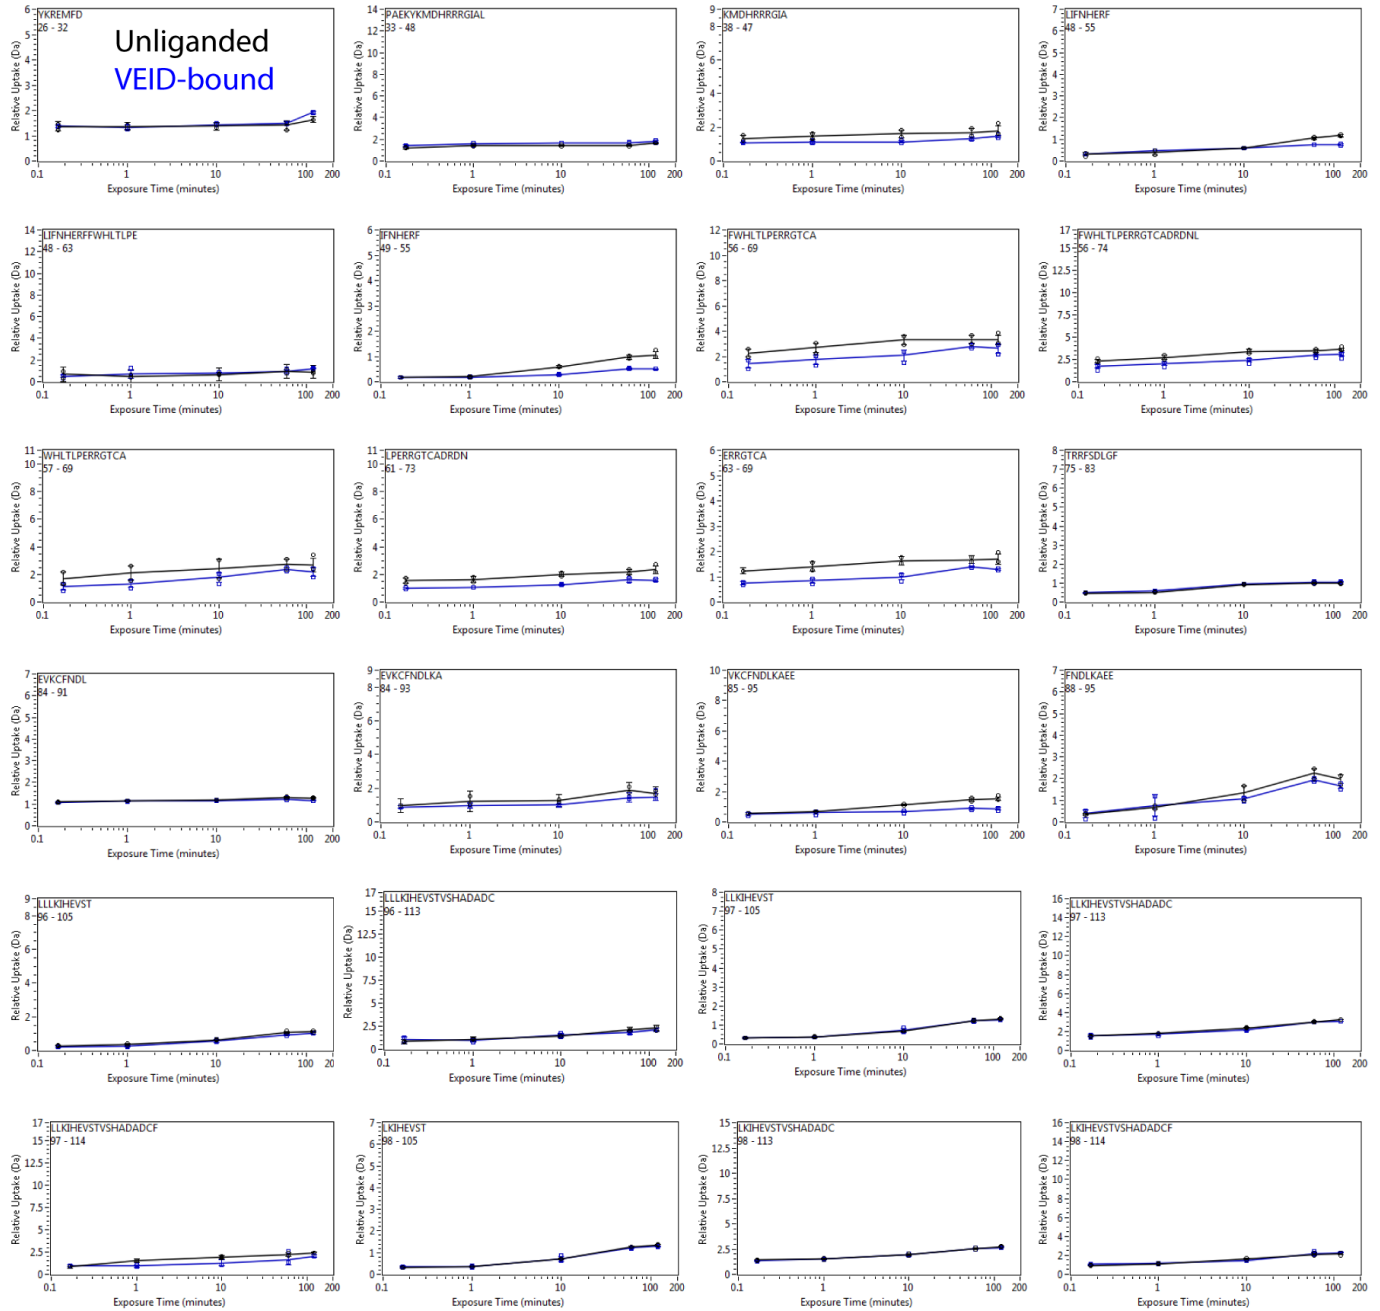

**Supplemental Figure S5.** Relative deuterium uptake plots comparing the unliganded (*black line*) and the VEID-bound (*blue line*) states of caspase-6 as a function of H/D exchange incubation period. The amino acid sequence and number are shown for each peptic peptide of caspase-6. The standard deviations (SD) of two independent H/DX-MS experiments performed in two separate days are indicated.



## Supplemental Figure S5 (continued)

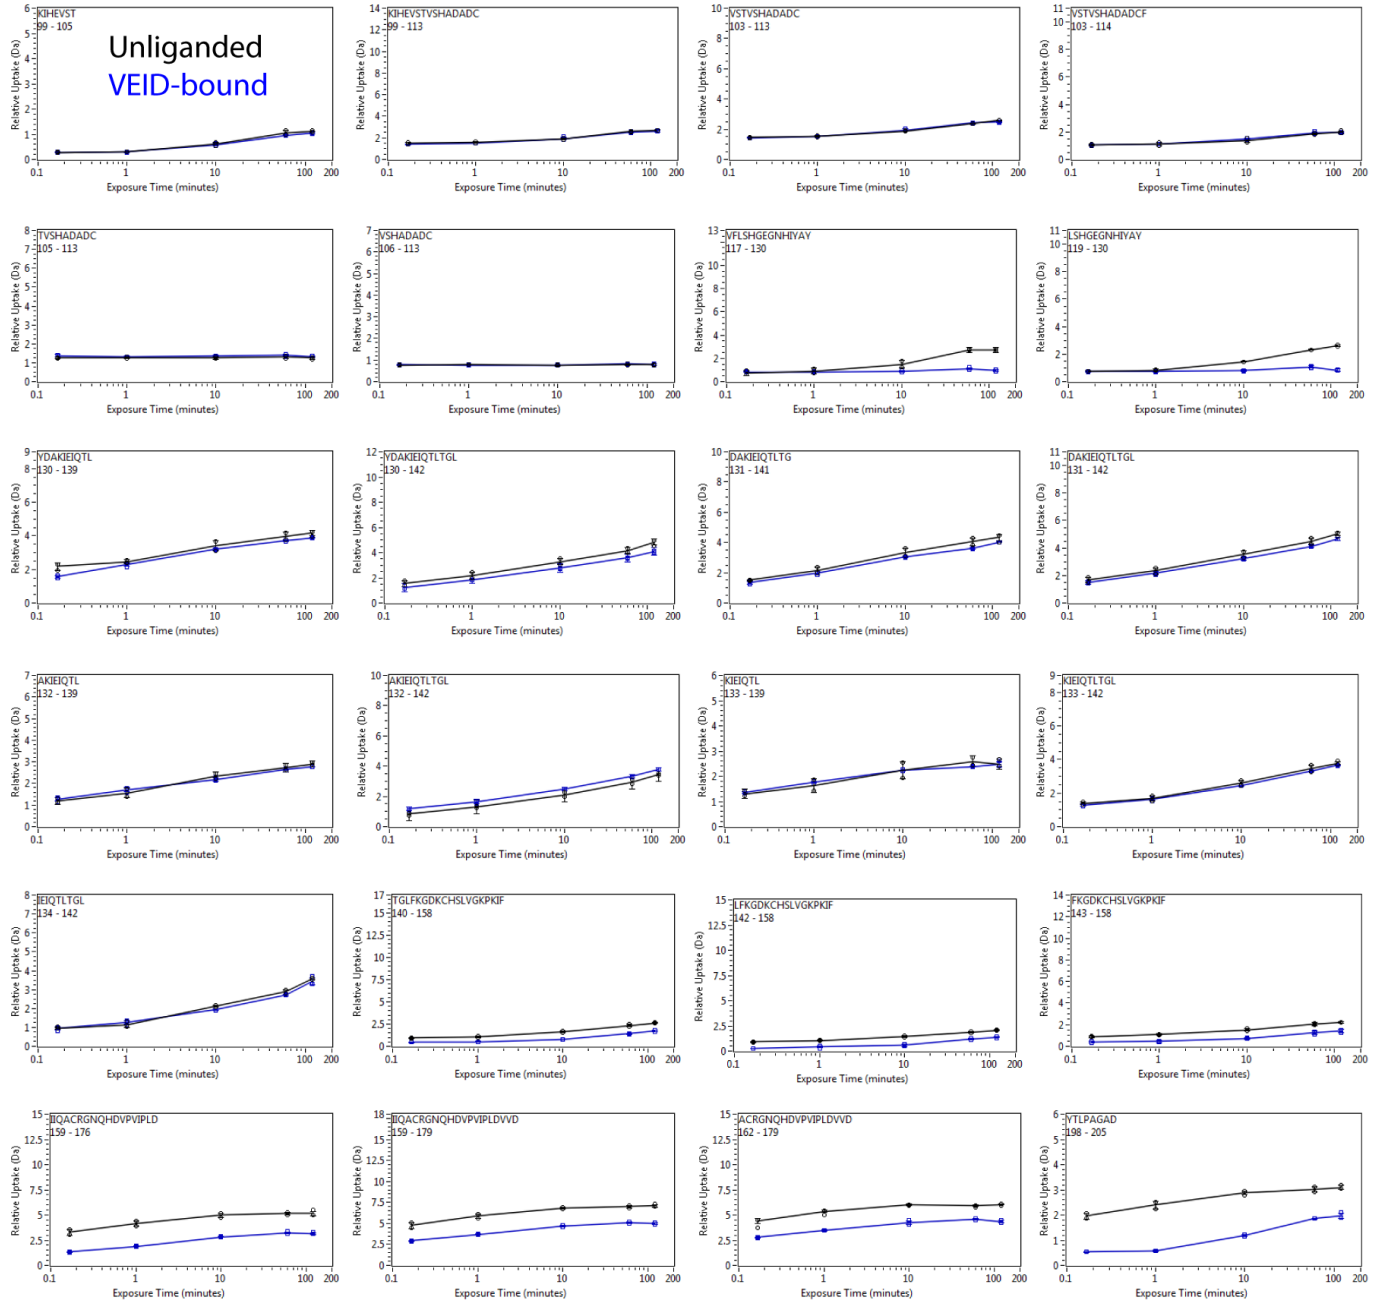

## Supplemental Figure S5 (continued)

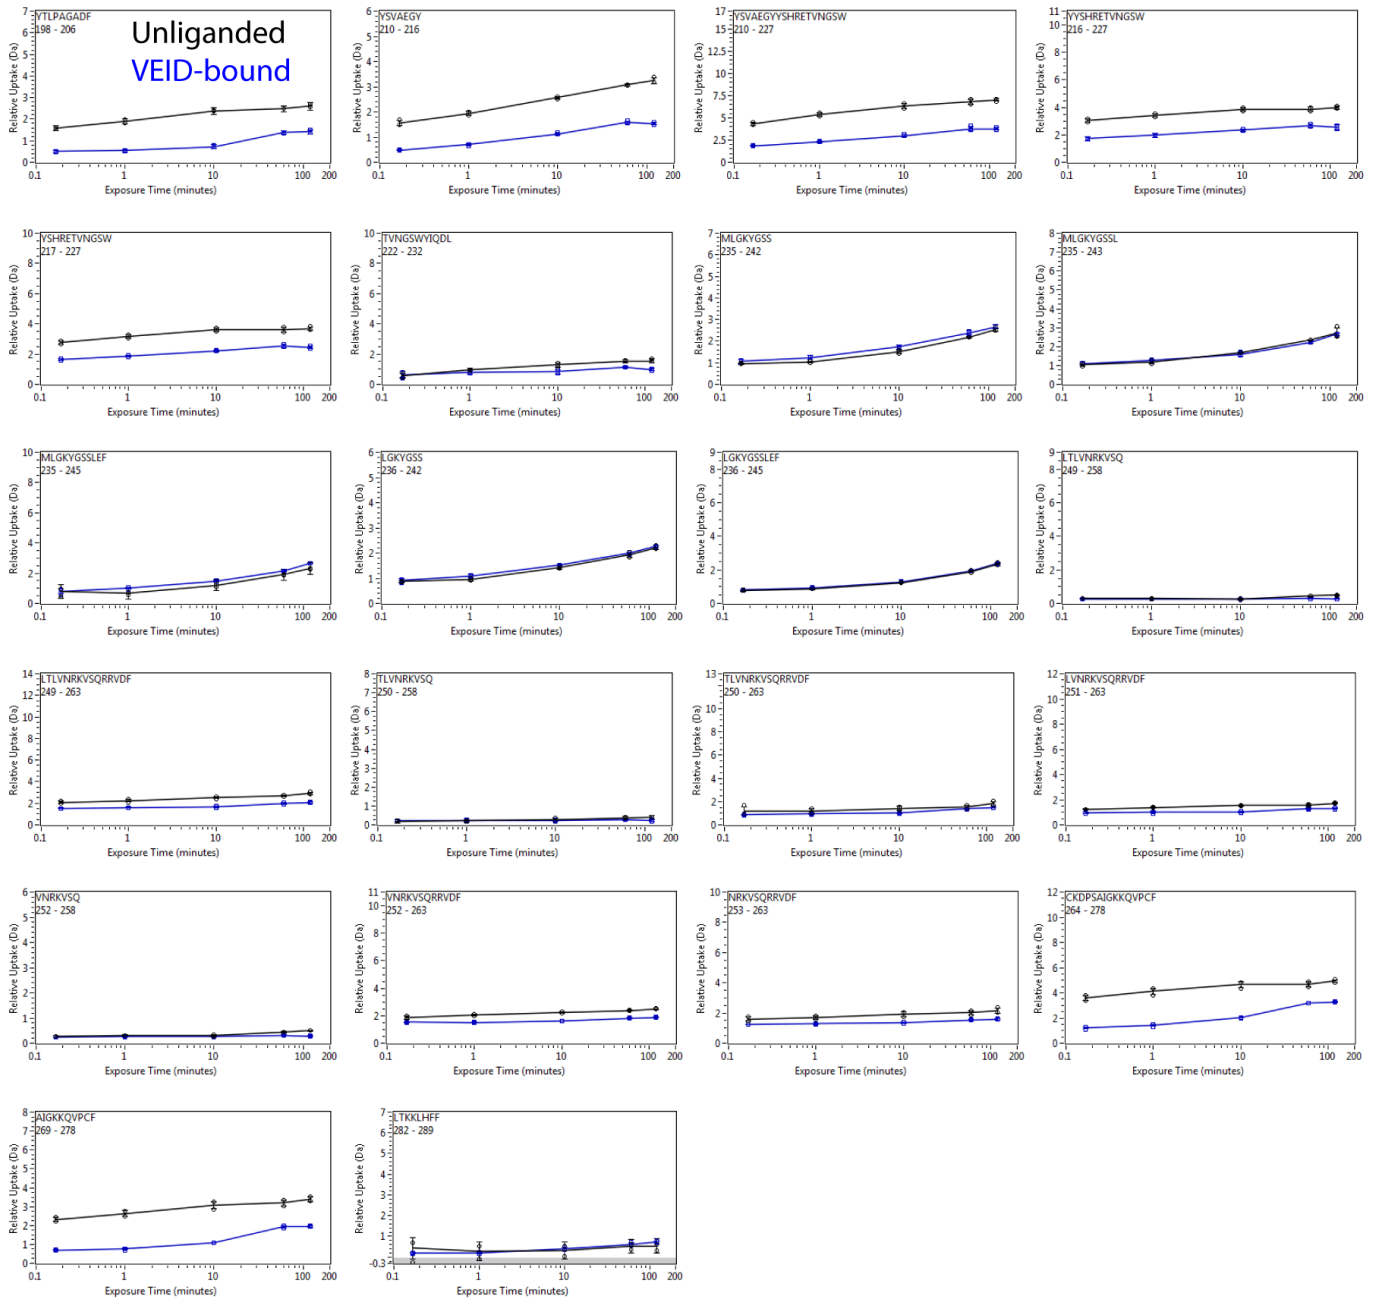

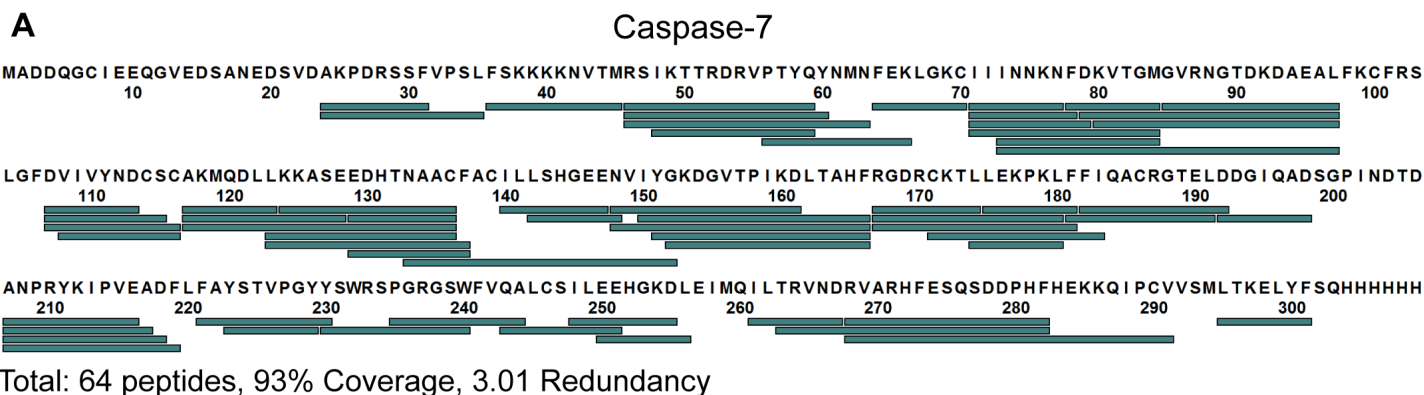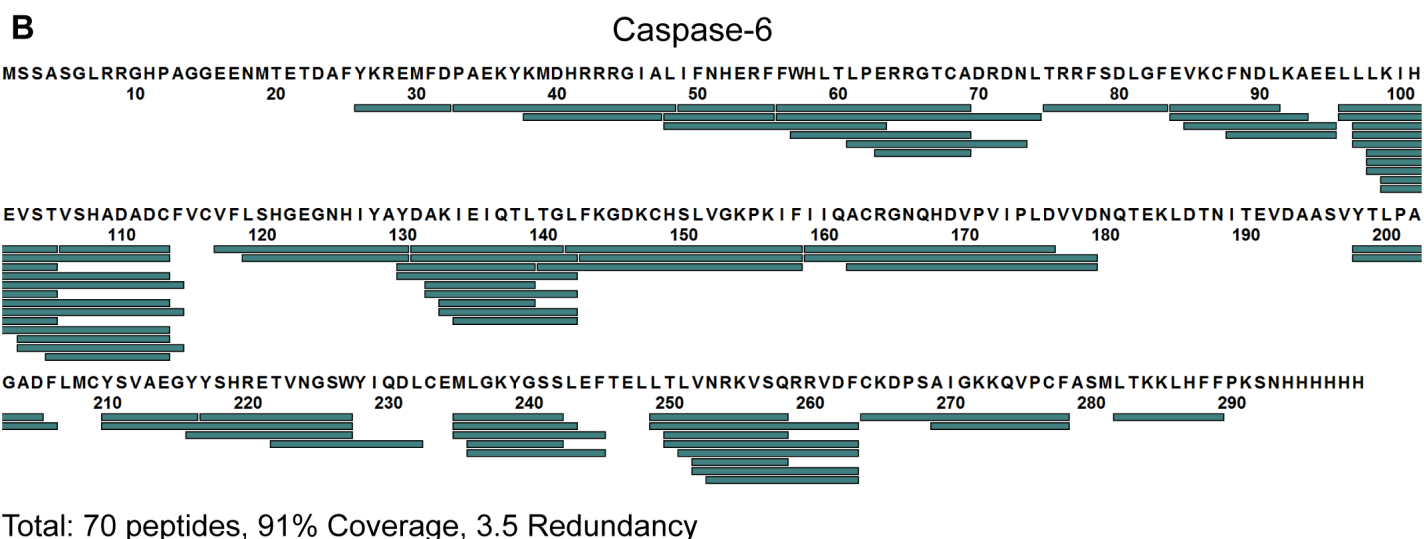

**Supplemental Figure S6.** Coverage Map of the peptic peptides identified from H/DX-MS experiments for caspase-7 (A) and caspase-6 (B) in both the unliganded and the peptide-based substrate mimic-bound states. In both caspase-6 and caspase-7, the protein constructs used were designed to exclude the prodomain and linker, which represent the fully cleaved and active form of the enzymes.

## Supplemental Figure S7A

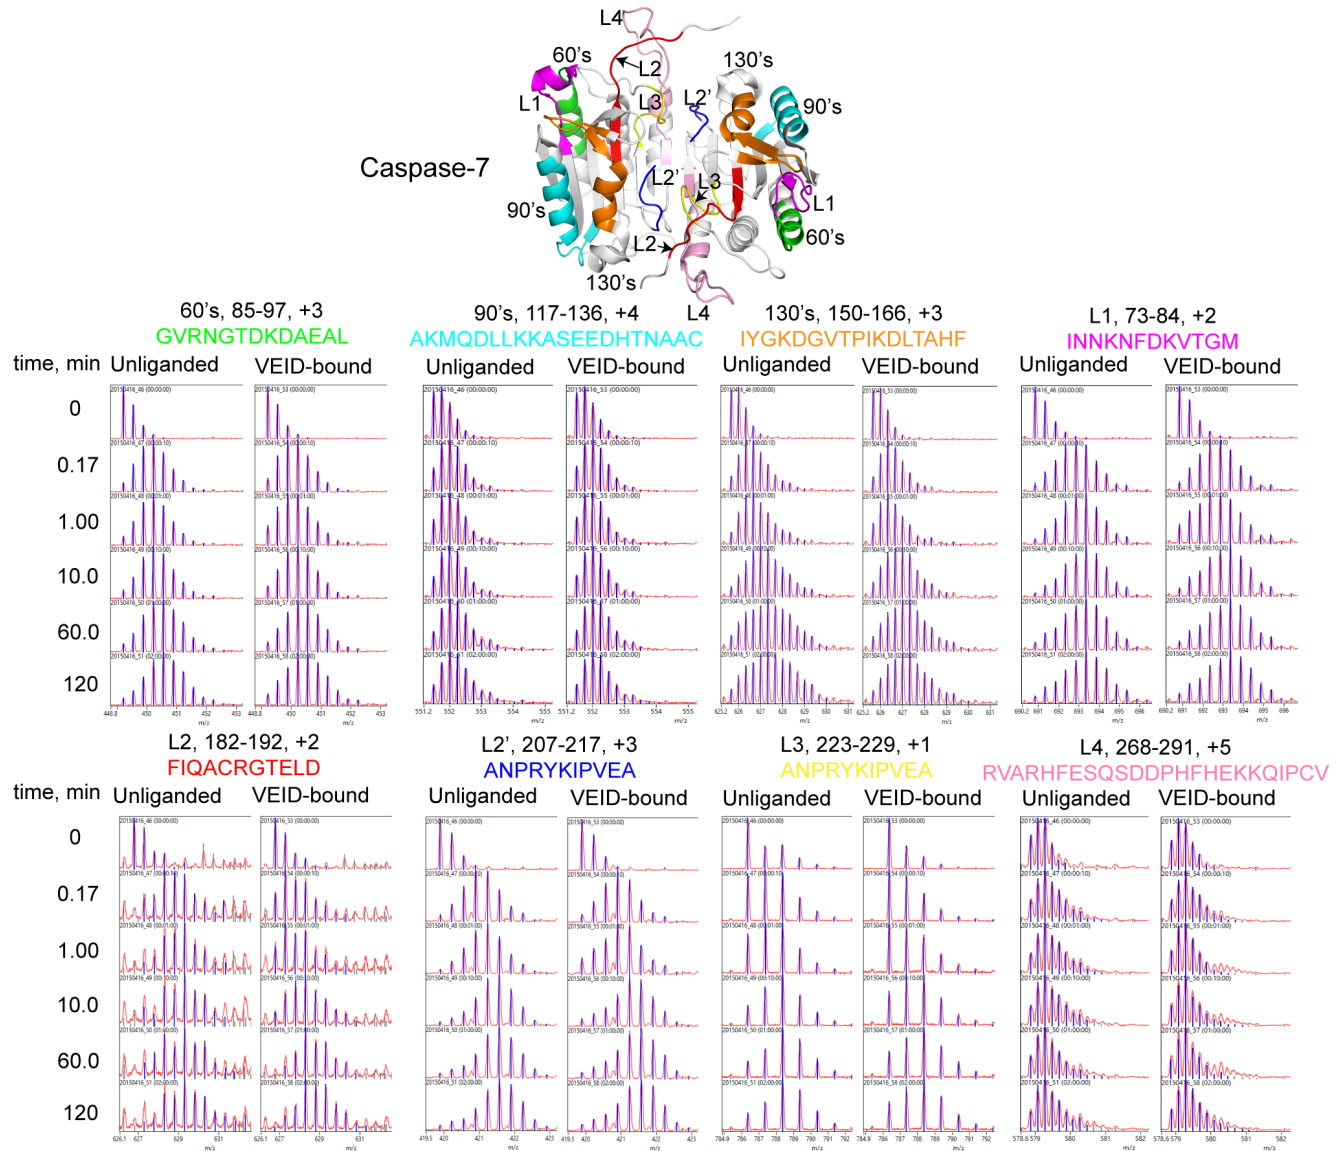

**Supplemental Figure S7.** Representative MS spectra of the peptic peptides following H/D exchange experiments of the unliganded and peptide-based substrate mimic-bound states of caspase-7 (A) and caspase-6 (B). The relative location of the highlighted regions (60's, green; 90's, cyan; 130's, orange; L1, magenta; L2, red; L3, yellow; L4, pink) and its representative peptic peptides are shown mapped onto the corresponding crystal structures of caspase-7 (PDB code 1K86) and caspase-6 (PDB code 2WDP). The amino acid sequence, the charge state and the residue number covered by the representative peptic peptide are also indicated.

## Supplemental Figure S7B

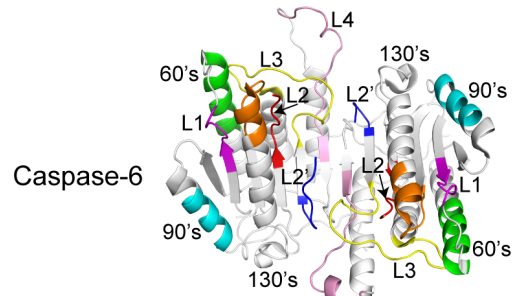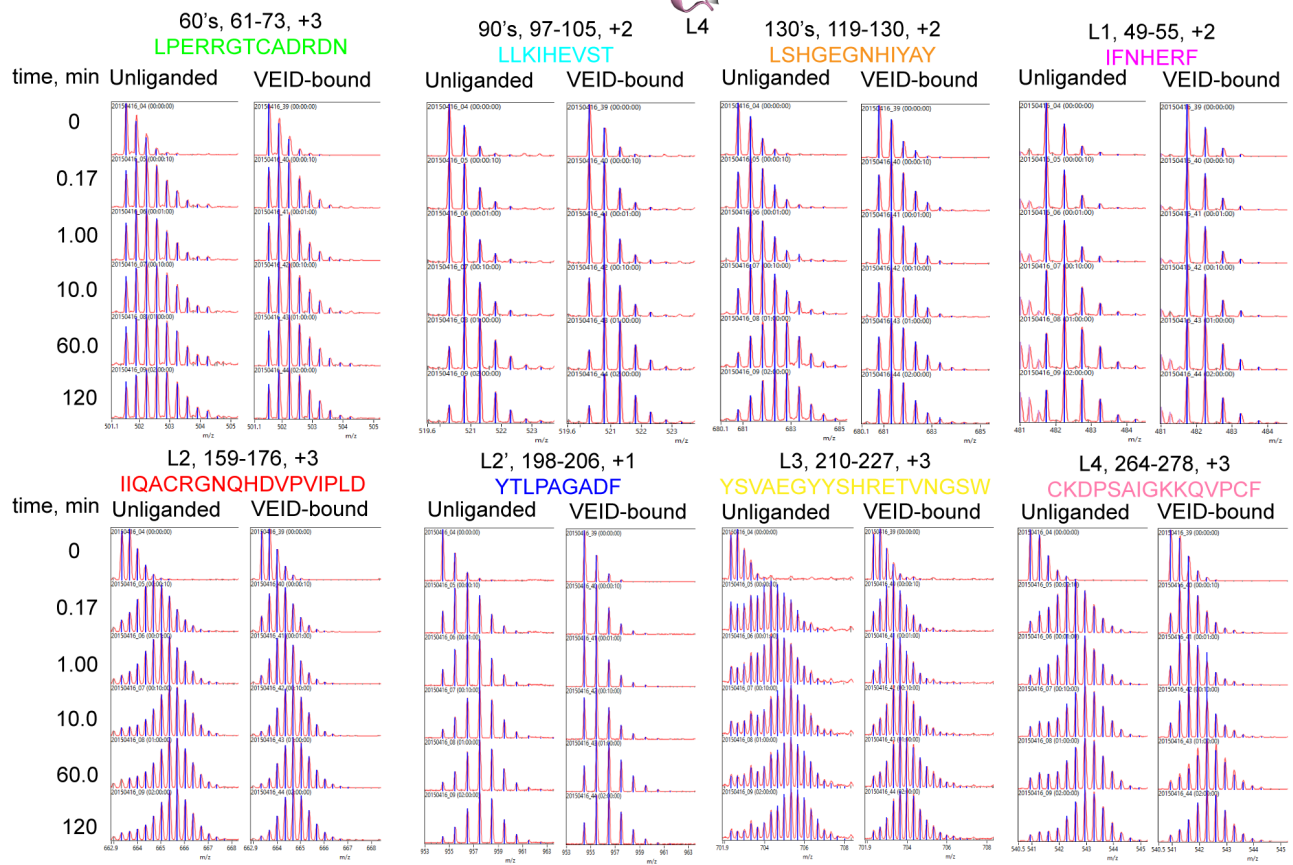

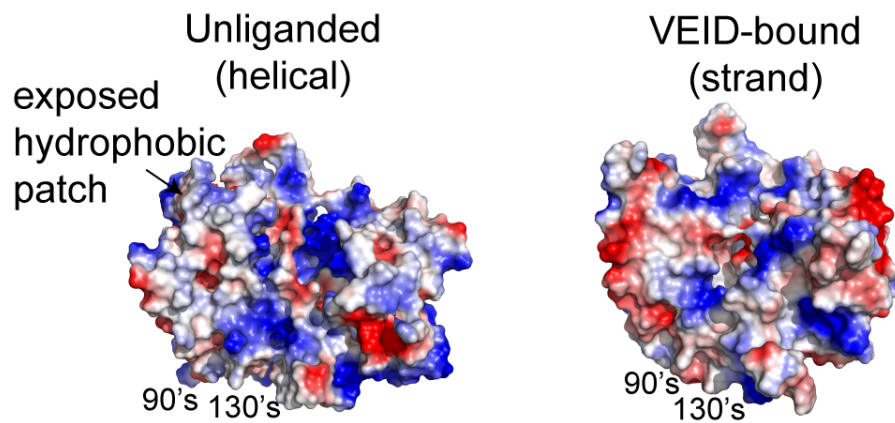

**Supplemental Figure S8.** Map of the electrostatic potential of caspase-6 in the unliganded (*left*, PDB code 2WDP) and the VEID-bound (*right*, PDB code 3OD5) states are shown (*red*, acidic regions; *blue*, basic regions; *white*, hydrophobic/neutral regions). The vacuum electrostatic potential maps were generated using Pymol (Schrodinger) and the arrow indicates electrostatic potential map around the hydrophobic patch.
